# Supplementary material
Source: publisher figshare collection journal article supplement (https://gsajournals.figshare.com/ndownloader/files/21823209)
Supplement: Supplementary file 1 [file 21823209]

## Sheet: Sheet1
Table S3. Power and False discovery proportion (FDP) for each simulation replicate when detecting masked CVs with GxS interactions using a posterior probability threshold of 0.9
Replicate	LBR (posrterior probability) threshold	Target area	LBR (SNP) Powera	LBR (SNP) FDPa	LBR (Window) Powerb	LBR (Window) FDPb
1	0.9	1MB	0.283	0.0455	0.35	0.0667
2	0.9	1MB	0.45	0.0385	0.567	0.0163
3	0.9	1MB	0.4	0	0.517	0
4	0.9	1MB	0.367	0	0.383	0
5	0.9	1MB	0.5	0.0312	0.55	0.106
6	0.9	1MB	0.433	0.0385	0.617	0.00813
7	0.9	1MB	0.483	0	0.533	0
8	0.9	1MB	0.433	0	0.517	0
9	0.9	1MB	0.367	0	0.433	0
10	0.9	1MB	0.5	0	0.7	0
11	0.9	1MB	0.367	0	0.45	0
12	0.9	1MB	0.433	0	0.617	0.0157
13	0.9	1MB	0.4	0	0.567	0
14	0.9	1MB	0.417	0	0.483	0
15	0.9	1MB	0.483	0	0.583	0
16	0.9	1MB	0.35	0.0455	0.367	0.0734
17	0.9	1MB	0.567	0.0312	0.667	0.0714
18	0.9	1MB	0.433	0	0.483	0
19	0.9	1MB	0.383	0.0476	0.517	0.0536
20	0.9	1MB	0.417	0.0323	0.45	0.0275
21	0.9	1MB	0.533	0	0.567	0
22	0.9	1MB	0.467	0.037	0.55	0.0296
23	0.9	1MB	0.367	0.0417	0.417	0.0737
24	0.9	1MB	0.4	0.13	0.5	0.0762
25	0.9	1MB	0.4	0	0.417	0
26	0.9	1MB	0.383	0.115	0.483	0.069
27	0.9	1MB	0.433	0	0.533	0.0185
28	0.9	1MB	0.5	0.0588	0.6	0.0522
29	0.9	1MB	0.383	0.105	0.45	0.111
30	0.9	1MB	0.45	0.0833	0.55	0.015
		AVERAGE	0.426067	0.02937	0.513933	0.0294643
		SD	0.0604283	0.0376633	0.0852695	0.0356331
		SE	0.0110327	0.00687635	0.015568	0.00650569
a LBR (at the SNP level) uses PPDiffSNP		95% CI	[0.404 ; 0.448 ]	[0.016 ; 0.043 ]	[0.483 ; 0.544 ]	[0.017 ; 0.042 ]
b LBR (at the window level) uses
